# Supplementary material for: Environmentally friendly approach for sustainable recycling of spent SCR catalysts and Al alloy scrap to prepare TiAl3 and low-Fe Al alloys
Source: Royal Society of Chemistry journal article supplement (doi:10.1039/d2gc00885h), 2022-01-01
Supplement: d2gc00885h1.pdf [file d2gc00885h1.pdf]

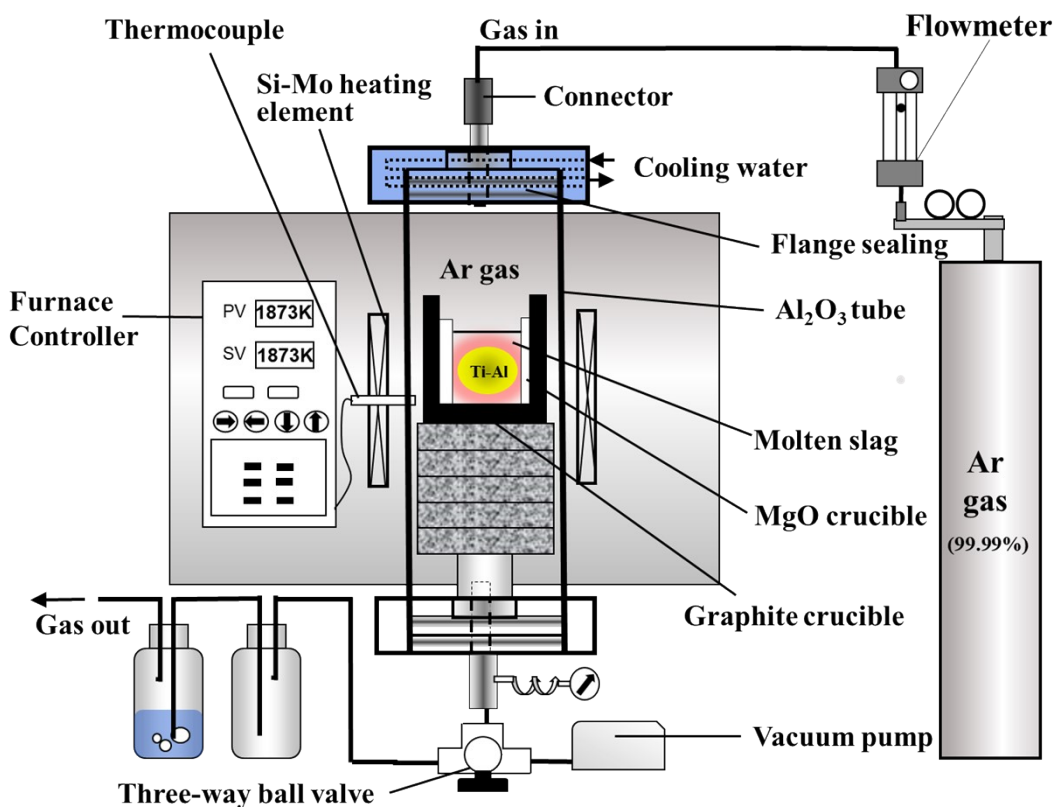

Fig. A.1. Si-Mo resistance furnace.

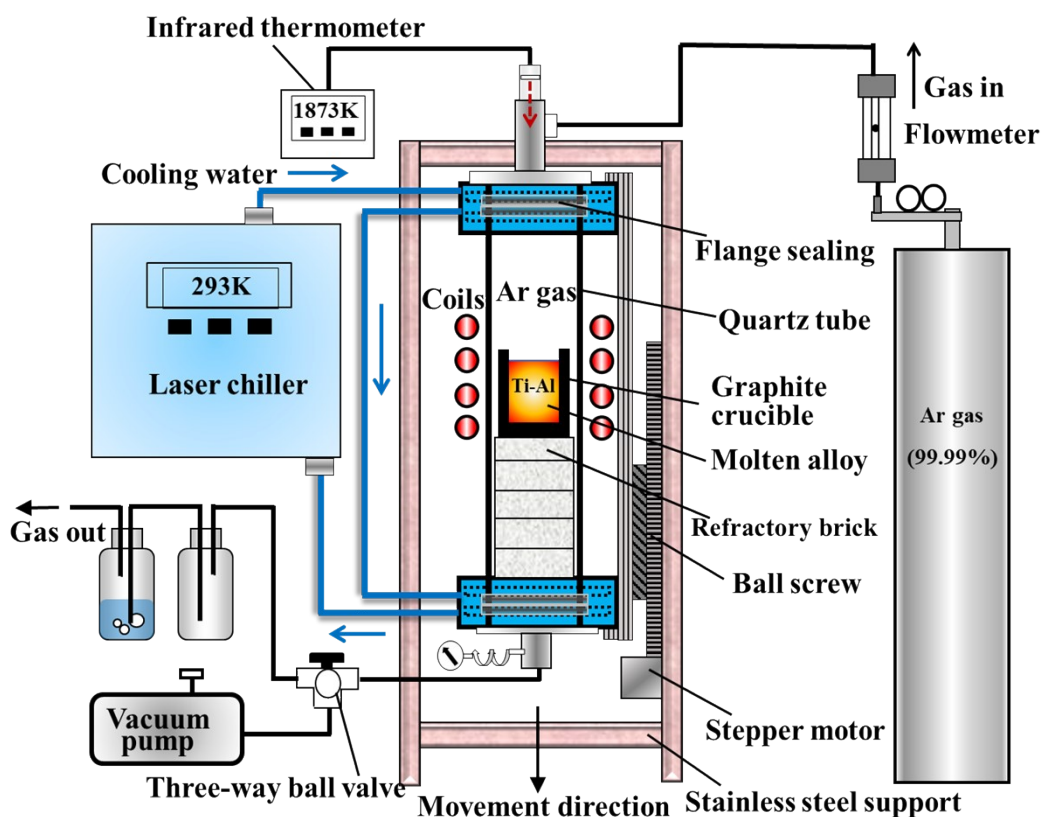

Fig. A.2. Induction furnace with directional crystallization system.
